# Supplementary material
Source: PubMed Central journal article supplement (PMC10739079)
Supplement: jamaoncol-e235444-s001.pdf [file jamaoncol-e235444-s001.pdf]

## Supplemental Online Content

Hazen S-M JA, Sluckin TC, Intven MPW, et al; Dutch Snapshot Research Group. Abandonment of routine radiotherapy for nonlocally advanced rectal cancer and oncological outcomes. *JAMA Oncol*. Published online December 21, 2023. doi:10.1001/jamaoncol.2023.5444

**eTable 1.** Overview of guideline differences

**eFigure 1.** (A) Local Recurrence Rate, (B) Distant Recurrence Rate, (C) Disease-Free Survival, (D) Overall Survival for cohort 2011, stratified for neoadjuvant (chemo)radiotherapy

**eFigure 2.** (A) Local Recurrence Rate, (B) Distant Recurrence Rate, (C) Disease-Free Survival, (D) Overall Survival for cohort 2016, stratified for neoadjuvant (chemo)radiotherapy

**eTable 2.** Univariate and multivariable analyses for Locoregional Recurrence and Overall Survival in cohort 2011

**eTable 3.** Univariate and multivariable analyses for Locoregional Recurrence and Overall Survival in cohort 2016

**eTable 4.** Causes of death per cohort and use of n(C)RT

This supplemental material has been provided by the authors to give readers additional information about their work.

**eTable 1 Overview of guideline differences**

|                                                    | <b>Guideline 2011 (version 2·1 2008)</b> | <b>Guideline 2016 (version 3·0 2014)</b>                                                                                                                                                           |
|----------------------------------------------------|------------------------------------------|----------------------------------------------------------------------------------------------------------------------------------------------------------------------------------------------------|
| <b>Treatment</b>                                   |                                          |                                                                                                                                                                                                    |
| <b>Surgery only</b>                                | cT1N0 (cT2N0 proximal tumors)            | cT1-3bN0(MRF-)                                                                                                                                                                                     |
| <b>5x5 Gy</b>                                      | cT2-cT4N0-1                              | cT3c-d(MRF-)N0 or cT1-3 (MRF-)N1                                                                                                                                                                   |
| <b>Chemoradiation</b>                              | Expected CRM+ or cN2                     | cT4 or MRF+ or cN2 or LLN                                                                                                                                                                          |
| <b>Diagnostics</b>                                 |                                          |                                                                                                                                                                                                    |
| <b>Definition suspicious mesorectal lymph node</b> | Diameter ≥ 5 mm                          | Diameter ≥ 9 mm or diameter 5-9 cm and 2 or 3 malignant characteristics or diameter < 5 mm and 3 malignant characteristics or diameter, i.e. round shape, heterogeneous aspect or irregular margin |
| <b>Safe margin to the mesorectal fascia</b>        | ≥5mm                                     | > 1 mm                                                                                                                                                                                             |

MRF: mesorectal fascial; LLN: lateral lymph node

**eFigure 1 (A) Local Recurrence Rate, (B) Distant Recurrence Rate, (C) Disease-Free Survival, (D) Overall Survival for cohort 2011, stratified for neoadjuvant (chemo)radiotherapy**

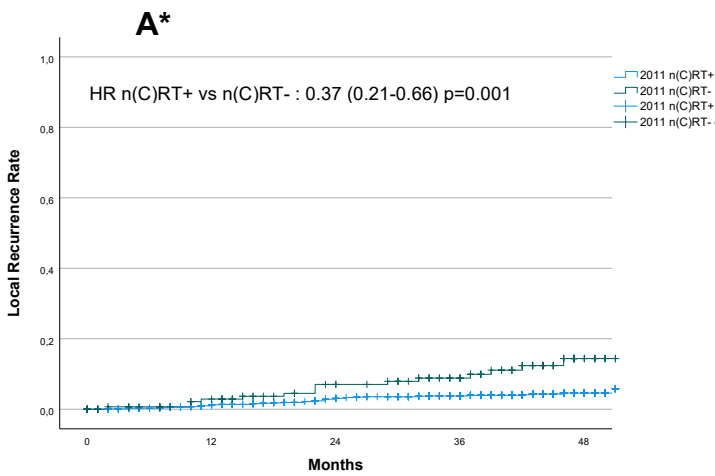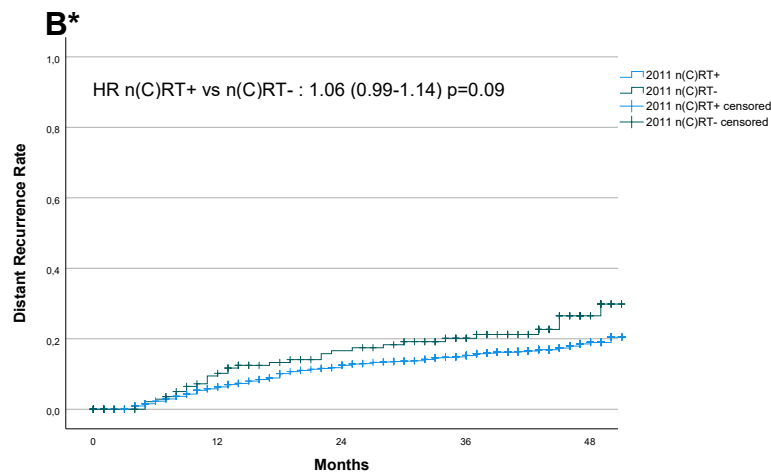

No. At risk:

|              |                   |     |     |     |     |
|--------------|-------------------|-----|-----|-----|-----|
| 2011 n(C)RT+ | 1026 <sup>a</sup> | 920 | 834 | 751 | 236 |
| 2011 n(C)RT- | 156 <sup>b</sup>  | 131 | 109 | 89  | 27  |

No. At risk:

|              |                   |     |     |     |     |
|--------------|-------------------|-----|-----|-----|-----|
| 2011 n(C)RT+ | 1023 <sup>c</sup> | 872 | 770 | 678 | 210 |
| 2011 n(C)RT- | 156 <sup>d</sup>  | 122 | 99  | 78  | 24  |

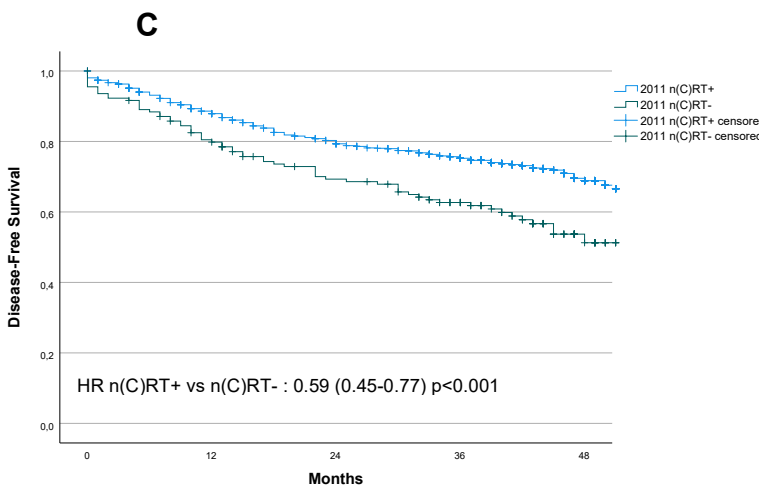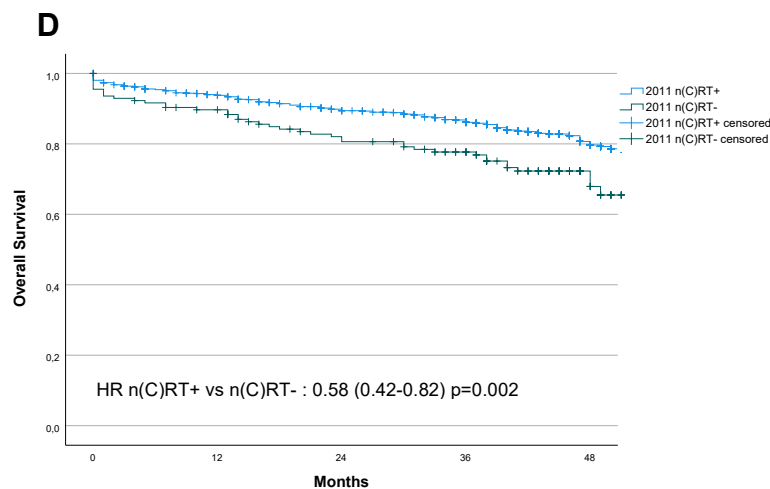

No. At risk:

|              |                   |     |     |     |     |
|--------------|-------------------|-----|-----|-----|-----|
| 2011 n(C)RT+ | 1028 <sup>e</sup> | 875 | 766 | 673 | 208 |
| 2011 n(C)RT- | 156 <sup>f</sup>  | 121 | 97  | 76  | 22  |

No. At risk:

|              |                   |     |     |     |     |
|--------------|-------------------|-----|-----|-----|-----|
| 2011 n(C)RT+ | 1027 <sup>g</sup> | 924 | 848 | 761 | 243 |
| 2011 n(C)RT- | 156 <sup>h</sup>  | 135 | 115 | 99  | 33  |

\* The presented hazard ratio is the adjusted hazard ratio after competing risk analyses, with death as competing risk

<sup>a</sup>Data were missing in 8 patients in the 2011 n(C)RT+ group for the endpoint local recurrence

<sup>b</sup>Data were missing in 5 patients in the 2011 n(C)RT- for the endpoint local recurrence

<sup>c</sup>Data were missing in 15 patient in the 2011 n(C)RT+ group for the endpoint distant recurrence

<sup>d</sup>Data were missing in 5 patients in the 2011 n(C)RT- cohort for the endpoint distant recurrence

<sup>e</sup>Data were missing in 10 patients in the 2011 n(C)RT+ group for the endpoint disease free survival

<sup>f</sup>Data were missing in 5 patients in the 2011 n(C)RT- group for the endpoint disease free survival

<sup>g</sup>Data were missing in 11 patients in the 2011 n(C)RT+ for the endpoint overall survival

<sup>h</sup>Data were missing in 5 patient in the 2011 n(C)RT- group for the endpoint overall survival

**eFigure 2 (A) Local Recurrence Rate, (B) Distant Recurrence Rate, (C) Disease-Free Survival, (D) Overall Survival for cohort 2016, stratified for neoadjuvant (chemo)radiotherapy**

**A\***

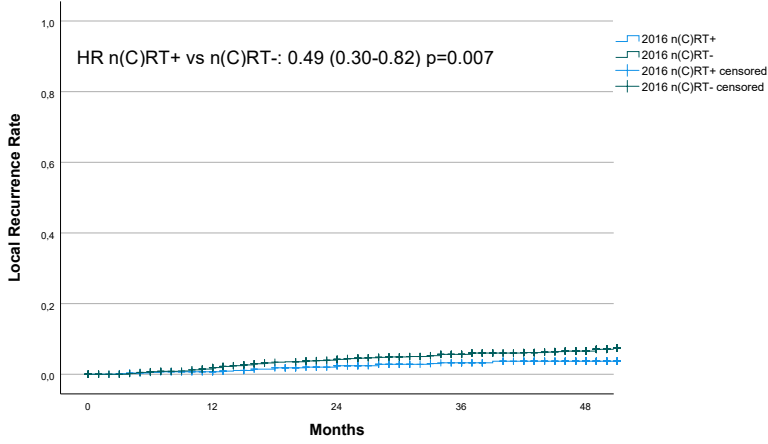

No. At risk:

|              |     |     |     |     |     |
|--------------|-----|-----|-----|-----|-----|
| 2016 n(C)RT+ | 582 | 544 | 499 | 449 | 365 |
| 2016 n(C)RT- | 994 | 925 | 848 | 765 | 620 |

**B\***

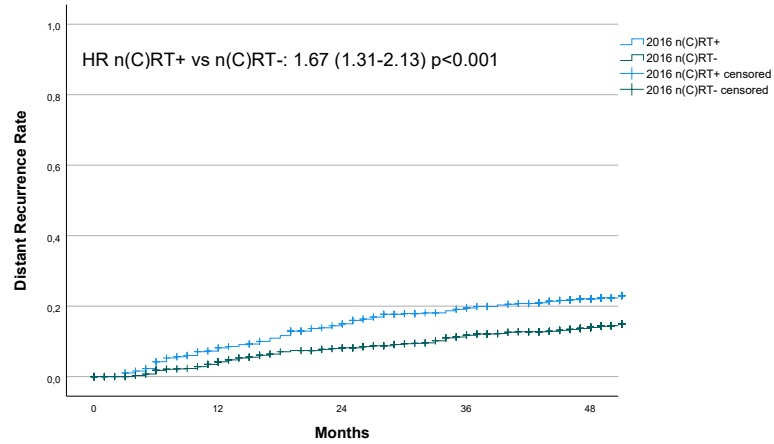

No. At risk:

|              |                  |     |     |     |     |
|--------------|------------------|-----|-----|-----|-----|
| 2016 n(C)RT+ | 581 <sup>a</sup> | 513 | 454 | 399 | 322 |
| 2016 n(C)RT- | 994              | 905 | 817 | 735 | 604 |

**C**

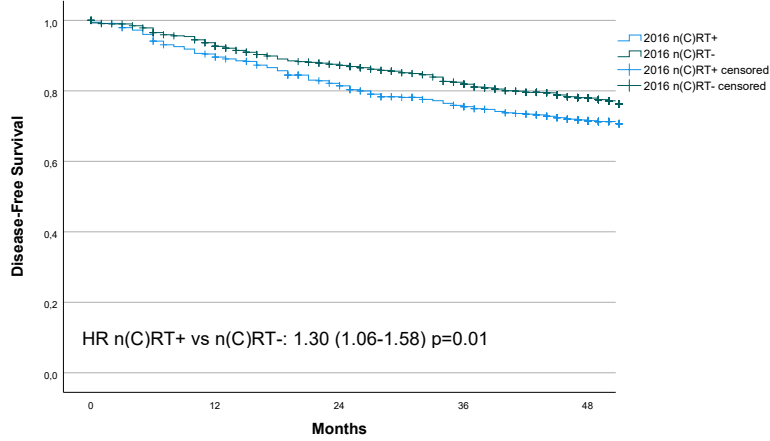

No. At risk:

|              |     |     |     |     |     |
|--------------|-----|-----|-----|-----|-----|
| 2016 n(C)RT+ | 582 | 518 | 457 | 401 | 324 |
| 2016 n(C)RT- | 994 | 906 | 814 | 729 | 594 |

**D**

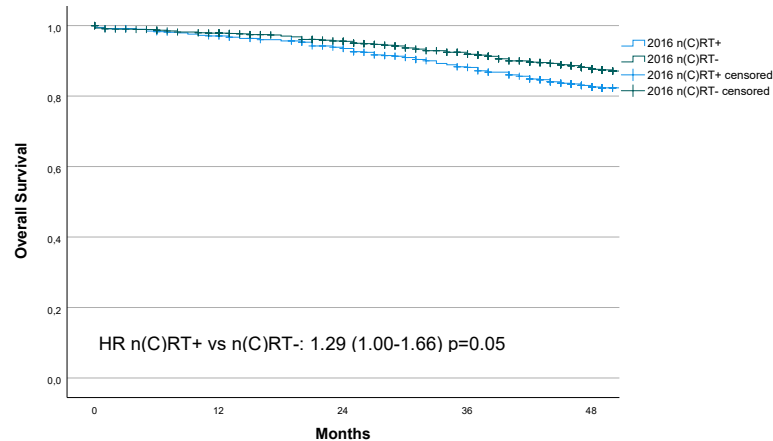

No. At risk:

|              |     |     |     |     |     |
|--------------|-----|-----|-----|-----|-----|
| 2016 n(C)RT+ | 582 | 556 | 521 | 467 | 377 |
| 2016 n(C)RT- | 994 | 947 | 890 | 813 | 656 |

\*The presented hazard ratio is the adjusted hazard ratio after competing risk analyses, with death as competing risk

<sup>a</sup>Data was missing in 1 patient in the 2016 n(C)RT+ group for the endpoint distant recurrence

**eTable 2 Univariate and multivariable analyses for Locoregional Recurrence and Overall Survival in cohort 2011**

| Variable                        | No   | Local Recurrence     |             |                        |             |       | Overall Survival     |             |                        |             |        |
|---------------------------------|------|----------------------|-------------|------------------------|-------------|-------|----------------------|-------------|------------------------|-------------|--------|
|                                 |      | Univariable analysis |             | Multivariable analysis |             |       | Univariable analysis |             | Multivariable analysis |             |        |
|                                 |      | HR                   | 95% CI      | HR                     | 95% CI      | P     | HR                   | 95% CI      | HR                     | 95% CI      | P      |
| <b>Sex</b>                      |      |                      |             |                        |             |       |                      |             |                        |             |        |
| Male                            | 758  | 1                    |             |                        |             |       | 1                    |             |                        |             |        |
| Female                          | 423  | 0.674                | 0.371-1.222 |                        |             |       | 0.644                | 0.477-0.870 |                        |             |        |
| <b>Age</b>                      | 1140 | 1.003                | 0.978-1.030 |                        |             |       | 1.074                | 1.058-1.091 | 1.074                  | 1.053-1.096 | <0.001 |
| <b>ASA score</b>                |      |                      |             |                        |             |       |                      |             |                        |             |        |
| I/II                            | 948  | 1                    |             |                        |             |       | 1                    |             | 1                      |             | <0.001 |
| III/IV                          | 206  | 1.110                | 0.522-2.359 |                        |             |       | 3.984                | 3.026-5.244 | 3.435                  | 2.388-4.943 |        |
| <b>Distance from ARJ</b>        | 821  | 1.047                | 0.965-1.137 |                        |             |       | 0.961                | 0.920-1.004 | 0.948                  | 0.905-0.994 | 0.03   |
| <b>Neoadjuvant radiotherapy</b> |      |                      |             |                        |             |       |                      |             |                        |             |        |
| No                              | 156  | 1                    |             | 1                      |             | 0.01  | 1                    |             |                        |             |        |
| Yes                             | 1026 | 0.350                | 0.193-0.635 | 0.427                  | 0.218-0.839 |       | 0.584                | 0.417-0.818 |                        |             |        |
| <b>Type of resection</b>        |      |                      |             |                        |             |       |                      |             |                        |             |        |
| (L)AR                           | 649  | 1                    |             | 1                      |             | 0.002 | 1                    |             |                        |             |        |
| APR                             | 288  | 2.040                | 1.049-3.968 | 2.744                  | 1.360-5.535 |       | 1.555                | 2.204-2.190 |                        |             |        |
| HP                              | 228  | 3.372                | 1.768-6.429 | 3.047                  | 1.546-6.002 |       | 2.920                | 2.126-4.011 |                        |             |        |
| <b>Approach</b>                 |      |                      |             |                        |             |       |                      |             |                        |             |        |
| Open                            | 636  | 1                    |             |                        |             |       | 1                    |             |                        |             |        |
| Minimal invasive                | 514  | 0.833                | 0.479-1.450 |                        |             |       | 0.893                | 0.680-1.173 |                        |             |        |

| Variable                     | No   | Local Recurrence     |              |                        |              |        | Overall Survival     |              |                        |              |        |
|------------------------------|------|----------------------|--------------|------------------------|--------------|--------|----------------------|--------------|------------------------|--------------|--------|
|                              |      | Univariable analysis |              | Multivariable analysis |              |        | Univariable analysis |              | Multivariable analysis |              |        |
|                              |      | HR                   | 95% CI       | HR                     | 95% CI       | P      | HR                   | 95% CI       | HR                     | 95% CI       | P      |
| <b>Adjuvant chemotherapy</b> |      |                      |              |                        |              |        |                      |              |                        |              |        |
| No                           | 1062 | 1                    |              |                        |              |        | 1                    |              |                        |              |        |
| Yes                          | 119  | 2.114                | 1.090-4.099  |                        |              |        | 0.763                | 0.471-1.236  |                        |              |        |
| <b>(y)pT-stage</b>           |      |                      |              |                        |              |        |                      |              |                        |              |        |
| (y)pT0                       | 52   | 1                    |              | 1                      |              | <0.001 | 1                    |              | 1                      |              | 0.004  |
| (y)pT1                       | 110  | 0.328                | 0.055-1.966  | 0.342                  | 0.056-2.078  |        | 0.715                | 0.272-1.879  | 0.758                  | 0.194-2.960  |        |
| (y)pT2                       | 452  | 0.408                | 0.112-1.481  | 0.415                  | 0.113-1.518  |        | 1.122                | 0.514-2.450  | 1.167                  | 0.359-3.797  |        |
| (y)pT3                       | 489  | 1.202                | 0.367-3.940  | 1.107                  | 0.332-3.693  |        | 2.075                | 0.969-4.447  | 2.025                  | 0.632-6.490  |        |
| (y)pT4                       | 21   | 8.582                | 2.136-34.481 | 4.665                  | 1.016-21.420 |        | 4.913                | 1.868-12.924 | 4.189                  | 0.940-18.675 |        |
| <b>(y)pN-stage</b>           |      |                      |              |                        |              |        |                      |              |                        |              |        |
| (y)pN0                       | 756  | 1                    |              |                        |              |        | 1                    |              | 1                      |              | <0.001 |
| (y)pN1                       | 292  | 1.858                | 1.003-3.442  |                        |              |        | 1.667                | 1.234-2.252  | 1.618                  | 1.092-2.398  |        |
| (y)pN2                       | 80   | 3.708                | 1.672-8.226  |                        |              |        | 2.851                | 1.883-4.318  | 2.801                  | 1.602-4.896  |        |
| <b>Resection margin</b>      |      |                      |              |                        |              |        |                      |              |                        |              |        |
| R0                           | 1106 | 1                    |              | 1                      |              | 0.004  | 1                    |              |                        |              |        |
| R1                           | 28   | 9.250                | 4.162-20.559 | 3.604                  | 1.513-8.587  |        | 2.797                | 1.523-5.136  |                        |              |        |
| <b>Pelvic sepsis</b>         |      |                      |              |                        |              |        |                      |              |                        |              |        |
| No                           | 92   | 1                    |              |                        |              |        | 1                    |              |                        |              |        |
| Yes                          | 203  | 1.015                | 0.493-2.088  |                        |              |        | 1.322                | 0.946-1.848  |                        |              |        |

**eTable 3 Univariate and multivariable analyses for Locoregional Recurrence and Overall Survival in cohort 2016**

| Variable                        | No   | Local Recurrence     |             |                        |             | P      | Overall Survival     |             |                        |             |        |
|---------------------------------|------|----------------------|-------------|------------------------|-------------|--------|----------------------|-------------|------------------------|-------------|--------|
|                                 |      | Univariable analysis |             | Multivariable analysis |             |        | Univariable analysis |             | Multivariable analysis |             |        |
|                                 |      | HR                   | 95% CI      | HR                     | 95% CI      |        | HR                   | 95% CI      | HR                     | 95% CI      | P      |
| <b>Sex</b>                      |      |                      |             |                        |             |        |                      |             |                        |             |        |
| Male                            | 1029 | 1                    |             | 1                      |             | 0.04   | 1                    |             |                        |             |        |
| Female                          | 547  | 0.590                | 0.357-0.976 | 0.566                  | 0.329-0.973 |        | 0.906                | 0.690-1.188 |                        |             |        |
| <b>Age</b>                      | 1541 | 1.011                | 0.987-1.034 |                        |             |        | 1.073                | 1.057-1.089 | 1.061                  | 1.044-1.077 | <0.001 |
| <b>ASA score</b>                |      |                      |             |                        |             |        |                      |             |                        |             |        |
| I/II                            | 1296 | 1                    |             |                        |             |        | 1                    |             | 1                      |             | <0.001 |
| III/IV                          | 261  | 0.701                | 0.351-1.401 |                        |             |        | 2.762                | 2.101-3.632 | 1.906                  | 1.086-1.852 |        |
| <b>Distance from ARJ</b>        | 1371 | 0.845                | 0.784-0.911 | 0.816                  | 0.757-0.880 | <0.001 | 0.987                | 0.948-1.027 |                        |             |        |
| <b>Neoadjuvant radiotherapy</b> |      |                      |             |                        |             |        |                      |             |                        |             |        |
| No                              | 994  | 1                    |             | 0.409                  | 0.240-0.698 | 0.001  | 1                    |             | 1                      |             | 0.01   |
| Yes                             | 582  | 0.534                | 0.323-0.883 |                        |             |        | 1.287                | 0.996-1.563 | 1.418                  | 1.086-1.852 |        |
| <b>Type of resection</b>        |      |                      |             |                        |             |        |                      |             |                        |             |        |
| (L)AR                           | 1120 | 1                    |             |                        |             |        | 1                    |             |                        |             |        |
| APR                             | 267  | 2.404                | 1.462-3.954 |                        |             |        | 1.817                | 1.323-2.493 |                        |             |        |
| HP                              | 181  | 2.562                | 1.425-4.605 |                        |             |        | 2.891                | 2.092-3.995 |                        |             |        |
| <b>Approach</b>                 |      |                      |             |                        |             |        |                      |             |                        |             |        |
| Open                            | 167  | 1                    |             | 1                      |             | 0.02   | 1                    |             |                        |             |        |
| Minimal invasive                | 1409 | 0.546                | 0.307-0.970 | 0.487                  | 0.266-0.892 |        | 0.625                | 0.440-0.887 |                        |             |        |

| Variable                     | No   | Local Recurrence     |               |                        |               |        | Overall Survival     |              |                        |              |        |
|------------------------------|------|----------------------|---------------|------------------------|---------------|--------|----------------------|--------------|------------------------|--------------|--------|
|                              |      | Univariable analysis |               | Multivariable analysis |               |        | Univariable analysis |              | Multivariable analysis |              |        |
|                              |      | HR                   | 95% CI        | HR                     | 95% CI        | P      | HR                   | 95% CI       | HR                     | 95% CI       | P      |
| <b>Adjuvant chemotherapy</b> |      |                      |               |                        |               |        |                      |              |                        |              |        |
| No                           | 1536 | 1                    |               |                        |               |        |                      | 1            |                        |              |        |
| Yes                          | 40   | 0.441                | 0.061-3.168   |                        |               |        | 0.484                | 0.155-1.512  |                        |              |        |
| <b>(y)pT-stage</b>           |      |                      |               |                        |               |        |                      |              |                        |              |        |
| (y)pT0                       | 47   | 1                    |               | 1                      |               | 0.004  | 1                    |              | 1                      |              | <0.001 |
| (y)pT1                       | 274  | 1.418                | 0.177-11.339  | 1.023                  | 0.116-9.034   |        | 1.514                | 0.457-5.016  | 1.817                  | 0.542-6.094  |        |
| (y)pT2                       | 610  | 1.830                | 0.248-13.504  | 1.364                  | 0.179-10.530  |        | 1.525                | 0.479-4.856  | 1.738                  | 0.508-5.282  |        |
| (y)pT3                       | 618  | 3.509                | 0.484-25.461  | 2.721                  | 0.358-20.648  |        | 3.548                | 1.130-11.141 | 2.819                  | 0.882-9.009  |        |
| (y)pT4                       | 25   | 11.250               | 1.256-100.754 | 10.874                 | 1.030-114.840 |        | 10.633               | 2.965-38.146 | 6.952                  | 1.882-25.683 |        |
| <b>(y)pN-stage</b>           |      |                      |               |                        |               |        |                      |              |                        |              |        |
| (y)pN0                       | 1084 | 1                    |               | 1                      |               | <0.001 | 1                    |              | 1                      |              | <0.001 |
| (y)pN1                       | 365  | 2.211                | 1.360-3.592   | 1.870                  | 1.091-3.206   |        | 1.773                | 1.321-2.379  | 1.256                  | 0.919-1.715  |        |
| (y)pN2                       | 125  | 4.176                | 2.333-7.478   | 3.779                  | 2.013-7.095   |        | 3.886                | 2.774-5.444  | 2.424                  | 1.665-3.528  |        |
| <b>Resection margin</b>      |      |                      |               |                        |               |        |                      |              |                        |              |        |
| R0                           | 1516 | 1                    |               |                        |               |        | 1                    |              | 1                      |              | <0.001 |
| R1                           | 58   | 4.969                | 2.633-9.377   |                        |               |        | 3.997                | 2.659-6.010  | 2.595                  | 1.694-3.977  |        |
| <b>Pelvic sepsis</b>         |      |                      |               |                        |               |        |                      |              |                        |              |        |
| No                           | 1346 | 1                    |               |                        |               |        | 1                    |              |                        |              |        |
| Yes                          | 222  | 1.668                | 0.990-2.812   |                        |               |        | 1.027                | 0.717-1.470  |                        |              |        |



**eTable 4 Causes of death per cohort and use of n(C)RT**

|                        | <b>Cohort 2011<br/>(C)RT- (n=43)</b> | <b>Cohort 2011<br/>(C)RT+ (n=174)</b> | <b>Cohort 2016<br/>(C)RT- (n=135)</b> | <b>Cohort 2016<br/>(C)RT+ (n=103)</b> |
|------------------------|--------------------------------------|---------------------------------------|---------------------------------------|---------------------------------------|
|                        | <b>n (%)</b>                         | <b>n (%)</b>                          | <b>n (%)</b>                          | <b>n (%)</b>                          |
| Rectal cancer          | 13 (30)                              | 56 (32)                               | 73 (54)                               | 57 (55)                               |
| Surgical complications | 4 (9)                                | 14 (8)                                | 1 (1)                                 | 1 (1)                                 |
| Secondary malignancy   | 4 (9)                                | 15 (9)                                | 17 (13)                               | 9 (9)                                 |
| Cardiovascular cause   | 6 (14)                               | 17 (10)                               | 13 (1)                                | 9 (9)                                 |
| Pulmonary cause        | 3 (7)                                | 18 (10)                               | 6 (4)                                 | 3 (3)                                 |
| Infectious cause       | 0 (0)                                | 1 (1)                                 | 2 (2)                                 | 3 (3)                                 |
| Neurological cause     | 2 (5)                                | 3 (2)                                 | 5 (4)                                 | 2 (2)                                 |
| Ileus                  | 0 (0)                                | 2 (1)                                 | 1 (1)                                 | 1 (1)                                 |
| Other                  | 1 (2)                                | 4 (2)                                 | 4 (3)                                 | 1 (1)                                 |
| Unknown                | 10 (23)                              | 44 (25)                               | 13 (10)                               | 17 (17)                               |
