# Supplementary material
Source: PubMed Central journal article supplement (PMC10739079)
Supplement: jamaoncol-e235444-s002.pdf [file jamaoncol-e235444-s002.pdf]

## Supplemental Online Content: Nonauthor Collaborators

\*First name, last name, and suffix (if applicable) are required and will appear in PubMed.

| <b>*Group Name(s): Dutch Snapshot Research Group</b> |                   |                              |                  |             |                                          |                                                         |                                                                                            |
|------------------------------------------------------|-------------------|------------------------------|------------------|-------------|------------------------------------------|---------------------------------------------------------|--------------------------------------------------------------------------------------------|
| <b>*First Name and Middle Initial(s)</b>             | <b>*Last Name</b> | <b>*Suffix (eg, Jr, III)</b> | Academic Degrees | Institution | Location (city, state/province, country) | Role or Contribution, eg, chair, principal investigator | Group (if more than 1 Group listed in the byline) and/or Subgroup (eg, Steering Committee) |
| Arend G. J.                                          | Aalbers           |                              |                  |             |                                          |                                                         |                                                                                            |
| Susanna M.                                           | van Aalten        |                              |                  |             |                                          |                                                         |                                                                                            |
| Yair I. Z.                                           | Acherman          |                              |                  |             |                                          |                                                         |                                                                                            |
| Gijs D.                                              | Algie             |                              |                  |             |                                          |                                                         |                                                                                            |
| E. Boudewijn                                         | Alting von Geusau |                              |                  |             |                                          |                                                         |                                                                                            |
| Femke J.                                             | Amelung           |                              |                  |             |                                          |                                                         |                                                                                            |
| Marjolein                                            | Ankersmit         |                              |                  |             |                                          |                                                         |                                                                                            |
| Imogeen E.                                           | Antonisse         |                              |                  |             |                                          |                                                         |                                                                                            |
| Jesse F.                                             | Ashruf            |                              |                  |             |                                          |                                                         |                                                                                            |
| Tjeerd S.                                            | Aukema            |                              |                  |             |                                          |                                                         |                                                                                            |
| Henk                                                 | Avenarius         |                              |                  |             |                                          |                                                         |                                                                                            |
| Renu R.                                              | Bahadoer          |                              |                  |             |                                          |                                                         |                                                                                            |
| Frans C. H.                                          | Bakers            |                              |                  |             |                                          |                                                         |                                                                                            |
| Ilisalien S.                                         | Bakker            |                              |                  |             |                                          |                                                         |                                                                                            |
| Fleur                                                | Bangert           |                              |                  |             |                                          |                                                         |                                                                                            |
| Renée M.                                             | Barendse          |                              |                  |             |                                          |                                                         |                                                                                            |
| S. A.                                                | Bartels           |                              |                  |             |                                          |                                                         |                                                                                            |
| S.                                                   | Basha             |                              |                  |             |                                          |                                                         |                                                                                            |
| J.                                                   | van Bastelaar     |                              |                  |             |                                          |                                                         |                                                                                            |
| Antonius J. N. M.                                    | Bastiaansen       |                              |                  |             |                                          |                                                         |                                                                                            |
| S. C.                                                | van Beek          |                              |                  |             |                                          |                                                         |                                                                                            |
| Heleen M.D.                                          | Beekhuis          |                              |                  |             |                                          |                                                         |                                                                                            |
| Eric H. J.                                           | Belgers           |                              |                  |             |                                          |                                                         |                                                                                            |
| Willem A.                                            | Bemelman          |                              |                  |             |                                          |                                                         |                                                                                            |
| Maike                                                | Berbée            |                              |                  |             |                                          |                                                         |                                                                                            |
| C.                                                   | van den Berg      |                              |                  |             |                                          |                                                         |                                                                                            |
| H. A.                                                | ten Berge         |                              |                  |             |                                          |                                                         |                                                                                            |
| Shira H.                                             | de Bie            |                              |                  |             |                                          |                                                         |                                                                                            |
| Jarmila D. W.                                        | van der Bilt      |                              |                  |             |                                          |                                                         |                                                                                            |

## Supplemental Online Content: Nonauthor Collaborators

\*First name, last name, and suffix (if applicable) are required and will appear in PubMed.

| *First Name and Middle Initial(s) | *Last Name                | *Suffix (eg, Jr, III) | Academic Degrees | Institution | Location (city, state/province, country) | Role or Contribution, eg, chair, principal investigator | Group (if more than 1 Group listed in the byline) and/or Subgroup (eg, Steering Committee) |
|-----------------------------------|---------------------------|-----------------------|------------------|-------------|------------------------------------------|---------------------------------------------------------|--------------------------------------------------------------------------------------------|
| Robert H. C.                      | Bisschops                 |                       |                  |             |                                          |                                                         |                                                                                            |
| W.                                | Bleeker                   |                       |                  |             |                                          |                                                         |                                                                                            |
| J.                                | Blok                      |                       |                  |             |                                          |                                                         |                                                                                            |
| Robin D.                          | Blok                      |                       |                  |             |                                          |                                                         |                                                                                            |
| Liselotte W.                      | van Bockel                |                       |                  |             |                                          |                                                         |                                                                                            |
| Anniek H.                         | Boer                      |                       |                  |             |                                          |                                                         |                                                                                            |
| Frank C.                          | den Boer                  |                       |                  |             |                                          |                                                         |                                                                                            |
| Evert-Jan G.                      | Boerma                    |                       |                  |             |                                          |                                                         |                                                                                            |
| H. Jaap                           | Bonjer                    |                       |                  |             |                                          |                                                         |                                                                                            |
| Leonora S. F.                     | Boogerd                   |                       |                  |             |                                          |                                                         |                                                                                            |
| Jaap                              | Borstlap                  |                       |                  |             |                                          |                                                         |                                                                                            |
| I.                                | van den Bosch             |                       |                  |             |                                          |                                                         |                                                                                            |
| Robbert J. I                      | Bosker                    |                       |                  |             |                                          |                                                         |                                                                                            |
| J. W.                             | Bosmans                   |                       |                  |             |                                          |                                                         |                                                                                            |
| M. C.                             | Boute                     |                       |                  |             |                                          |                                                         |                                                                                            |
| Nicole D.                         | Bouvy                     |                       |                  |             |                                          |                                                         |                                                                                            |
| Johanna E.                        | Bouwman                   |                       |                  |             |                                          |                                                         |                                                                                            |
| Sicco J.                          | Braak                     |                       |                  |             |                                          |                                                         |                                                                                            |
| Manon N. G. J. A.                 | Braat                     |                       |                  |             |                                          |                                                         |                                                                                            |
| Jennifer                          | Bradshaw                  |                       |                  |             |                                          |                                                         |                                                                                            |
| Amarins T. A.                     | Brandsma                  |                       |                  |             |                                          |                                                         |                                                                                            |
| A.                                | Brandt-Kerkhof,           |                       |                  |             |                                          |                                                         |                                                                                            |
| Vivian                            | van Breest<br>Smallenburg |                       |                  |             |                                          |                                                         |                                                                                            |
| D. J.                             | Brinkman                  |                       |                  |             |                                          |                                                         |                                                                                            |
| Wim T.                            | van den Broek             |                       |                  |             |                                          |                                                         |                                                                                            |
| S.                                | Bruin                     |                       |                  |             |                                          |                                                         |                                                                                            |
| Emma R. J.                        | Bruns                     |                       |                  |             |                                          |                                                         |                                                                                            |
| J. P. Maarten                     | Burbach                   |                       |                  |             |                                          |                                                         |                                                                                            |
| Sjirk W.                          | van der Burg              |                       |                  |             |                                          |                                                         |                                                                                            |
| Thijs A.                          | Burghgraef                |                       |                  |             |                                          |                                                         |                                                                                            |

Supplemental Online Content: Nonauthor Collaborators

\*First name, last name, and suffix (if applicable) are required and will appear in PubMed.

| *First Name and Middle Initial(s) | *Last Name             | *Suffix (eg, Jr, III) | Academic Degrees | Institution | Location (city, state/province, country) | Role or Contribution, eg, chair, principal investigator | Group (if more than 1 Group listed in the byline and/or Subgroup (eg, Steering Committee)) |
|-----------------------------------|------------------------|-----------------------|------------------|-------------|------------------------------------------|---------------------------------------------------------|--------------------------------------------------------------------------------------------|
| Christianne J.                    | Buskens                |                       |                  |             |                                          |                                                         |                                                                                            |
| David W. G.                       | ten Cate               |                       |                  |             |                                          |                                                         |                                                                                            |
| Heleen M.                         | Ceha                   |                       |                  |             |                                          |                                                         |                                                                                            |
| Stefan                            | Clermonts              |                       |                  |             |                                          |                                                         |                                                                                            |
| Jeltsje S.                        | Cnossen                |                       |                  |             |                                          |                                                         |                                                                                            |
| Robert R. J.                      | Coebergh van den Braak |                       |                  |             |                                          |                                                         |                                                                                            |
| Peter Paul L. O.                  | Coene                  |                       |                  |             |                                          |                                                         |                                                                                            |
| C.                                | Compaan                |                       |                  |             |                                          |                                                         |                                                                                            |
| Esther C. J.                      | Consten                |                       |                  |             |                                          |                                                         |                                                                                            |
| Maike                             | Corver                 |                       |                  |             |                                          |                                                         |                                                                                            |
| Rogier M. P. H.                   | Crolla                 |                       |                  |             |                                          |                                                         |                                                                                            |
| Sam                               | Curutchet              |                       |                  |             |                                          |                                                         |                                                                                            |
| Alette W                          | Daniëls-Gooszen        |                       |                  |             |                                          |                                                         |                                                                                            |
| T.                                | Darbyshire             |                       |                  |             |                                          |                                                         |                                                                                            |
| Paul H. P.                        | Davids                 |                       |                  |             |                                          |                                                         |                                                                                            |
| Charlotte L.                      | Deijen                 |                       |                  |             |                                          |                                                         |                                                                                            |
| Emmelie N.                        | Dekker                 |                       |                  |             |                                          |                                                         |                                                                                            |
| Jan Willem T.                     | Dekker                 |                       |                  |             |                                          |                                                         |                                                                                            |
| Ahmet                             | Demirkiran             |                       |                  |             |                                          |                                                         |                                                                                            |
| Tyche                             | Derksen                |                       |                  |             |                                          |                                                         |                                                                                            |
| M.                                | Derx-Hendriksen        |                       |                  |             |                                          |                                                         |                                                                                            |
| Arjen L.                          | Diederik               |                       |                  |             |                                          |                                                         |                                                                                            |
| F. R.                             | Dijkstra               |                       |                  |             |                                          |                                                         |                                                                                            |
| Anne M.                           | Dinaux                 |                       |                  |             |                                          |                                                         |                                                                                            |
| Kemal                             | Dogan                  |                       |                  |             |                                          |                                                         |                                                                                            |
| Ilse M.                           | van Dop                |                       |                  |             |                                          |                                                         |                                                                                            |
| Kitty E.                          | Droogh-de Greve        |                       |                  |             |                                          |                                                         |                                                                                            |
| Hanneke M.H.                      | Duijsens               |                       |                  |             |                                          |                                                         |                                                                                            |
| P.                                | van Duijvendijk        |                       |                  |             |                                          |                                                         |                                                                                            |
| Marcel                            | den Dulk               |                       |                  |             |                                          |                                                         |                                                                                            |

## Supplemental Online Content: Nonauthor Collaborators

\*First name, last name, and suffix (if applicable) are required and will appear in PubMed.

| *First Name and Middle Initial(s) | *Last Name  | *Suffix (eg, Jr, III) | Academic Degrees | Institution | Location (city, state/province, country) | Role or Contribution, eg, chair, principal investigator | Group (if more than 1 Group listed in the byline) and/or Subgroup (eg, Steering Committee) |
|-----------------------------------|-------------|-----------------------|------------------|-------------|------------------------------------------|---------------------------------------------------------|--------------------------------------------------------------------------------------------|
| Michalda S.                       | Dunker      |                       |                  |             |                                          |                                                         |                                                                                            |
| Johan                             | Duyck       |                       |                  |             |                                          |                                                         |                                                                                            |
| Eino B.                           | van Duyn    |                       |                  |             |                                          |                                                         |                                                                                            |
| C.                                | van Eekelen |                       |                  |             |                                          |                                                         |                                                                                            |
| Laurentine S. E.                  | van Egdom   |                       |                  |             |                                          |                                                         |                                                                                            |
| Bram                              | Eijlers     |                       |                  |             |                                          |                                                         |                                                                                            |
| Q. E.                             | Eijsbouts   |                       |                  |             |                                          |                                                         |                                                                                            |
| Youssef                           | El-Massoudi |                       |                  |             |                                          |                                                         |                                                                                            |
| Saskia                            | van Elderen |                       |                  |             |                                          |                                                         |                                                                                            |
| Anouk M. L. H.                    | Emmen       |                       |                  |             |                                          |                                                         |                                                                                            |
| Marc                              | Engelbrecht |                       |                  |             |                                          |                                                         |                                                                                            |
| Anne C.                           | van Erp     |                       |                  |             |                                          |                                                         |                                                                                            |
| Jeroen A.                         | van Essen   |                       |                  |             |                                          |                                                         |                                                                                            |
| Hans F. J.                        | Fabry       |                       |                  |             |                                          |                                                         |                                                                                            |
| Thomas                            | Fassaert    |                       |                  |             |                                          |                                                         |                                                                                            |
| Eline A.                          | Feitsma     |                       |                  |             |                                          |                                                         |                                                                                            |
| F.                                | Ferenschild |                       |                  |             |                                          |                                                         |                                                                                            |
| Shirin S.                         | Feshtali    |                       |                  |             |                                          |                                                         |                                                                                            |
| J.W.                              | Foppen      |                       |                  |             |                                          |                                                         |                                                                                            |
| Bas                               | Frietman    |                       |                  |             |                                          |                                                         |                                                                                            |
| K.                                | van Gangelt |                       |                  |             |                                          |                                                         |                                                                                            |
| Anne                              | van Geel    |                       |                  |             |                                          |                                                         |                                                                                            |
| Anne A.W.                         | van Geloven |                       |                  |             |                                          |                                                         |                                                                                            |
| Michael F.                        | Gerhards    |                       |                  |             |                                          |                                                         |                                                                                            |
| P.                                | Gerven      |                       |                  |             |                                          |                                                         |                                                                                            |
| Hugo                              | Gielkens    |                       |                  |             |                                          |                                                         |                                                                                            |
| Renza                             | van Gils    |                       |                  |             |                                          |                                                         |                                                                                            |
| Lucas                             | Goense      |                       |                  |             |                                          |                                                         |                                                                                            |
| Jan A. H.                         | Gooszen     |                       |                  |             |                                          |                                                         |                                                                                            |
| Johannes A.                       | Govaert     |                       |                  |             |                                          |                                                         |                                                                                            |
| Marc J. P. M.                     | Govaert     |                       |                  |             |                                          |                                                         |                                                                                            |

## Supplemental Online Content: Nonauthor Collaborators

\*First name, last name, and suffix (if applicable) are required and will appear in PubMed.

| *First Name and Middle Initial(s) | *Last Name      | *Suffix (eg, Jr, III) | Academic Degrees | Institution | Location (city, state/province, country) | Role or Contribution, eg, chair, principal investigator | Group (if more than 1 Group listed in the byline) and/or Subgroup (eg, Steering Committee) |
|-----------------------------------|-----------------|-----------------------|------------------|-------------|------------------------------------------|---------------------------------------------------------|--------------------------------------------------------------------------------------------|
| Eelco J. R.                       | de Graaf        |                       |                  |             |                                          |                                                         |                                                                                            |
| Wilhelmina M. U.                  | van Grevenstein |                       |                  |             |                                          |                                                         |                                                                                            |
| E. Joline                         | de Groof        |                       |                  |             |                                          |                                                         |                                                                                            |
| Irene                             | de Groot        |                       |                  |             |                                          |                                                         |                                                                                            |
| Robbert J.                        | de Haas         |                       |                  |             |                                          |                                                         |                                                                                            |
| Roel                              | Haen            |                       |                  |             |                                          |                                                         |                                                                                            |
| S. J.                             | van der Hagen   |                       |                  |             |                                          |                                                         |                                                                                            |
| Nadia A. G.                       | Hakkenbrak      |                       |                  |             |                                          |                                                         |                                                                                            |
| Joris J.                          | Harlaar         |                       |                  |             |                                          |                                                         |                                                                                            |
| E.                                | Harst           |                       |                  |             |                                          |                                                         |                                                                                            |
| Mariska D.                        | den Hartogh     |                       |                  |             |                                          |                                                         |                                                                                            |
| Klaas                             | Havenga         |                       |                  |             |                                          |                                                         |                                                                                            |
| J.                                | Heemskerk       |                       |                  |             |                                          |                                                         |                                                                                            |
| J. F.                             | Heeren          |                       |                  |             |                                          |                                                         |                                                                                            |
| Vera                              | Heesink         |                       |                  |             |                                          |                                                         |                                                                                            |
| B.                                | Heijnen         |                       |                  |             |                                          |                                                         |                                                                                            |
| Joost T.                          | Heikens         |                       |                  |             |                                          |                                                         |                                                                                            |
| Ellen M.                          | Hendriksen      |                       |                  |             |                                          |                                                         |                                                                                            |
| P.                                | Heres           |                       |                  |             |                                          |                                                         |                                                                                            |
| Sjoerd                            | van den Hoek    |                       |                  |             |                                          |                                                         |                                                                                            |
| H. G.                             | ten Hoeve       |                       |                  |             |                                          |                                                         |                                                                                            |
| Erik J. R. J.                     | van der Hoeven  |                       |                  |             |                                          |                                                         |                                                                                            |
| Christiaan                        | Hoff            |                       |                  |             |                                          |                                                         |                                                                                            |
| W.                                | Hogendoorn      |                       |                  |             |                                          |                                                         |                                                                                            |
| Anna                              | Hogewoning      |                       |                  |             |                                          |                                                         |                                                                                            |
| Cornelis R. C.                    | Hogewoning      |                       |                  |             |                                          |                                                         |                                                                                            |
| Stefan                            | Hoogendoorn     |                       |                  |             |                                          |                                                         |                                                                                            |
| P.                                | Hoogland        |                       |                  |             |                                          |                                                         |                                                                                            |
| Francois                          | van Hoorn       |                       |                  |             |                                          |                                                         |                                                                                            |
| A.                                | Huijbers        |                       |                  |             |                                          |                                                         |                                                                                            |
| René L.                           | van der Hul     |                       |                  |             |                                          |                                                         |                                                                                            |

## Supplemental Online Content: Nonauthor Collaborators

\*First name, last name, and suffix (if applicable) are required and will appear in PubMed.

| *First Name and Middle Initial(s) | *Last Name    | *Suffix (eg, Jr, III) | Academic Degrees | Institution | Location (city, state/province, country) | Role or Contribution, eg, chair, principal investigator | Group (if more than 1 Group listed in the byline) and/or Subgroup (eg, Steering Committee) |
|-----------------------------------|---------------|-----------------------|------------------|-------------|------------------------------------------|---------------------------------------------------------|--------------------------------------------------------------------------------------------|
| Rieke                             | van Hulst     |                       |                  |             |                                          |                                                         |                                                                                            |
| Farshad                           | Imani         |                       |                  |             |                                          |                                                         |                                                                                            |
| Bas                               | Inberg        |                       |                  |             |                                          |                                                         |                                                                                            |
| Pedro                             | Janssen       |                       |                  |             |                                          |                                                         |                                                                                            |
| Chris E. J.                       | de Jong       |                       |                  |             |                                          |                                                         |                                                                                            |
| Jacoline                          | Jonkers       |                       |                  |             |                                          |                                                         |                                                                                            |
| A. C.                             | Jongen        |                       |                  |             |                                          |                                                         |                                                                                            |
| F. H.                             | Jonker        |                       |                  |             |                                          |                                                         |                                                                                            |
| Daniela                           | Jou-Valencia  |                       |                  |             |                                          |                                                         |                                                                                            |
| Eleonora G.                       | Karthaus      |                       |                  |             |                                          |                                                         |                                                                                            |
| Bas                               | Keizers       |                       |                  |             |                                          |                                                         |                                                                                            |
| A.                                | Keijzer       |                       |                  |             |                                          |                                                         |                                                                                            |
| C.                                | van Kessel    |                       |                  |             |                                          |                                                         |                                                                                            |
| J. M. A.                          | Ketel         |                       |                  |             |                                          |                                                         |                                                                                            |
| Stijn H. J.                       | Ketelaers     |                       |                  |             |                                          |                                                         |                                                                                            |
| J.                                | Klaase        |                       |                  |             |                                          |                                                         |                                                                                            |
| F. W. H.                          | Kloppenber    |                       |                  |             |                                          |                                                         |                                                                                            |
| Eva                               | Knöps         |                       |                  |             |                                          |                                                         |                                                                                            |
| Sebastiaan                        | van Koeverden |                       |                  |             |                                          |                                                         |                                                                                            |
| Sylvia                            | Kok           |                       |                  |             |                                          |                                                         |                                                                                            |
| Stephanie E. M.                   | Kolderman     |                       |                  |             |                                          |                                                         |                                                                                            |
| M.E.                              | Kool          |                       |                  |             |                                          |                                                         |                                                                                            |
| Fleur I.                          | de Korte      |                       |                  |             |                                          |                                                         |                                                                                            |
| Robert T. J.                      | Kortekaas     |                       |                  |             |                                          |                                                         |                                                                                            |
| Julie C.                          | Korving       |                       |                  |             |                                          |                                                         |                                                                                            |
| Ingrid M.                         | Koster        |                       |                  |             |                                          |                                                         |                                                                                            |
| Jasenko                           | Krdzalic      |                       |                  |             |                                          |                                                         |                                                                                            |
| Pepijn                            | Krielen       |                       |                  |             |                                          |                                                         |                                                                                            |
| Leonard F.                        | Kroese        |                       |                  |             |                                          |                                                         |                                                                                            |
| Eveline J. T.                     | Krul          |                       |                  |             |                                          |                                                         |                                                                                            |
| Philip M.                         | Kruyt         |                       |                  |             |                                          |                                                         |                                                                                            |

## Supplemental Online Content: Nonauthor Collaborators

\*First name, last name, and suffix (if applicable) are required and will appear in PubMed.

| *First Name and Middle Initial(s) | *Last Name         | *Suffix (eg, Jr, III) | Academic Degrees | Institution | Location (city, state/province, country) | Role or Contribution, eg, chair, principal investigator | Group (if more than 1 Group listed in the byline and/or Subgroup (eg, Steering Committee)) |
|-----------------------------------|--------------------|-----------------------|------------------|-------------|------------------------------------------|---------------------------------------------------------|--------------------------------------------------------------------------------------------|
| J. T.                             | Kuiper             |                       |                  |             |                                          |                                                         |                                                                                            |
| Derk                              | Lahuis             |                       |                  |             |                                          |                                                         |                                                                                            |
| Bas                               | Lamme              |                       |                  |             |                                          |                                                         |                                                                                            |
| An A. G.                          | van Landeghem      |                       |                  |             |                                          |                                                         |                                                                                            |
| J. F.                             | Lange              |                       |                  |             |                                          |                                                         |                                                                                            |
| Mathilde M.                       | Leseman-Hoogenboom |                       |                  |             |                                          |                                                         |                                                                                            |
| Tanja                             | Lettinga           |                       |                  |             |                                          |                                                         |                                                                                            |
| Manou S.                          | de Lijster         |                       |                  |             |                                          |                                                         |                                                                                            |
| Daan J.                           | Lips               |                       |                  |             |                                          |                                                         |                                                                                            |
| Frank                             | Logeman            |                       |                  |             |                                          |                                                         |                                                                                            |
| Yu-Ting                           | van Loon           |                       |                  |             |                                          |                                                         |                                                                                            |
| Martijn F.                        | Lutke Holzik       |                       |                  |             |                                          |                                                         |                                                                                            |
| E.                                | Madsen             |                       |                  |             |                                          |                                                         |                                                                                            |
| Aziz                              | Mamound            |                       |                  |             |                                          |                                                         |                                                                                            |
| C. C.                             | Marres             |                       |                  |             |                                          |                                                         |                                                                                            |
| Martijn S.                        | Marsman            |                       |                  |             |                                          |                                                         |                                                                                            |
| Milou. H.                         | Martens            |                       |                  |             |                                          |                                                         |                                                                                            |
| Ilse                              | Masselink          |                       |                  |             |                                          |                                                         |                                                                                            |
| M.                                | Meerdink           |                       |                  |             |                                          |                                                         |                                                                                            |
| Wout                              | van der Meij       |                       |                  |             |                                          |                                                         |                                                                                            |
| Philip                            | Meijnen            |                       |                  |             |                                          |                                                         |                                                                                            |
| Anand G.                          | Menon              |                       |                  |             |                                          |                                                         |                                                                                            |
| Dietrich J. L.                    | de Mey             |                       |                  |             |                                          |                                                         |                                                                                            |
| J. Sven. D.                       | Mieog              |                       |                  |             |                                          |                                                         |                                                                                            |
| D.                                | Mierlo             |                       |                  |             |                                          |                                                         |                                                                                            |
| Sylvana M. L.                     | de Mik             |                       |                  |             |                                          |                                                         |                                                                                            |
| Julia                             | Moelker-Galuzina   |                       |                  |             |                                          |                                                         |                                                                                            |
| Linda                             | Morsink            |                       |                  |             |                                          |                                                         |                                                                                            |
| Erik J.                           | Mulder             |                       |                  |             |                                          |                                                         |                                                                                            |
| Karin                             | Muller             |                       |                  |             |                                          |                                                         |                                                                                            |

Supplemental Online Content: Nonauthor Collaborators

\*First name, last name, and suffix (if applicable) are required and will appear in PubMed.

| *First Name and Middle Initial(s) | *Last Name        | *Suffix (eg, Jr, III) | Academic Degrees | Institution | Location (city, state/province, country) | Role or Contribution, eg, chair, principal investigator | Group (if more than 1 Group listed in the byline and/or Subgroup (eg, Steering Committee) |
|-----------------------------------|-------------------|-----------------------|------------------|-------------|------------------------------------------|---------------------------------------------------------|-------------------------------------------------------------------------------------------|
| Gijsbert D.                       | Musters           |                       |                  |             |                                          |                                                         |                                                                                           |
| Peter A.                          | Neijenhuis        |                       |                  |             |                                          |                                                         |                                                                                           |
| Lindsey C. F.                     | de Nes            |                       |                  |             |                                          |                                                         |                                                                                           |
| M.                                | Nielen            |                       |                  |             |                                          |                                                         |                                                                                           |
| Jan B. J.                         | van den Nieuwboer |                       |                  |             |                                          |                                                         |                                                                                           |
| Jonanne F.                        | Nieuwenhuis       |                       |                  |             |                                          |                                                         |                                                                                           |
| Joost                             | Nonner            |                       |                  |             |                                          |                                                         |                                                                                           |
| Bo J.                             | Noordman          |                       |                  |             |                                          |                                                         |                                                                                           |
| Stefi                             | Nordkamp          |                       |                  |             |                                          |                                                         |                                                                                           |
| Pim B.                            | Olthof            |                       |                  |             |                                          |                                                         |                                                                                           |
| M.                                | Oostdijk          |                       |                  |             |                                          |                                                         |                                                                                           |
| Steven J.                         | Oosterling        |                       |                  |             |                                          |                                                         |                                                                                           |
| Daan                              | Ootes             |                       |                  |             |                                          |                                                         |                                                                                           |
| Vera                              | Oppedijk          |                       |                  |             |                                          |                                                         |                                                                                           |
| Pieter                            | Ott               |                       |                  |             |                                          |                                                         |                                                                                           |
| P. M. P.                          | Paul              |                       |                  |             |                                          |                                                         |                                                                                           |
| Ida                               | Paulusma          |                       |                  |             |                                          |                                                         |                                                                                           |
| Ilona T. A.                       | Pereboom          |                       |                  |             |                                          |                                                         |                                                                                           |
| Jan                               | Peringa           |                       |                  |             |                                          |                                                         |                                                                                           |
| Zoë                               | Pironet           |                       |                  |             |                                          |                                                         |                                                                                           |
| Joost D. J.                       | Plate             |                       |                  |             |                                          |                                                         |                                                                                           |
| Fatih                             | Polat             |                       |                  |             |                                          |                                                         |                                                                                           |
| P.                                | Poortman          |                       |                  |             |                                          |                                                         |                                                                                           |
| Ingrid G. M.                      | Poodt             |                       |                  |             |                                          |                                                         |                                                                                           |
| Lisanne A. E.                     | Posma             |                       |                  |             |                                          |                                                         |                                                                                           |
| Jeroen F.                         | Prette            |                       |                  |             |                                          |                                                         |                                                                                           |
| Bareld B.                         | Pultrum           |                       |                  |             |                                          |                                                         |                                                                                           |
| Seyed M.                          | Qaderi            |                       |                  |             |                                          |                                                         |                                                                                           |
| M.                                | Raber             |                       |                  |             |                                          |                                                         |                                                                                           |
| Jan M.                            | van Rees          |                       |                  |             |                                          |                                                         |                                                                                           |



## Supplemental Online Content: Nonauthor Collaborators

\*First name, last name, and suffix (if applicable) are required and will appear in PubMed.

| *First Name and Middle Initial(s) | *Last Name              | *Suffix (eg, Jr, III) | Academic Degrees | Institution | Location (city, state/province, country) | Role or Contribution, eg, chair, principal investigator | Group (if more than 1 Group listed in the byline) and/or Subgroup (eg, Steering Committee) |
|-----------------------------------|-------------------------|-----------------------|------------------|-------------|------------------------------------------|---------------------------------------------------------|--------------------------------------------------------------------------------------------|
| Beata M. M.                       | Reiber                  |                       |                  |             |                                          |                                                         |                                                                                            |
| Rutger-Jan                        | Renger                  |                       |                  |             |                                          |                                                         |                                                                                            |
| W. W.                             | ter Riele               |                       |                  |             |                                          |                                                         |                                                                                            |
| A.                                | van Rijswijk            |                       |                  |             |                                          |                                                         |                                                                                            |
| Anouk J. M.                       | Rombouts                |                       |                  |             |                                          |                                                         |                                                                                            |
| S. J.                             | van Rooijen             |                       |                  |             |                                          |                                                         |                                                                                            |
| Lodewijk                          | Roosen                  |                       |                  |             |                                          |                                                         |                                                                                            |
| Ellen A.                          | Roskott-ten Brinke      |                       |                  |             |                                          |                                                         |                                                                                            |
| Charles C.                        | van Rossem              |                       |                  |             |                                          |                                                         |                                                                                            |
| Joost                             | Rothbarth               |                       |                  |             |                                          |                                                         |                                                                                            |
| Dennis B.                         | Rouw                    |                       |                  |             |                                          |                                                         |                                                                                            |
| A.                                | Rutten                  |                       |                  |             |                                          |                                                         |                                                                                            |
| Heidi                             | Rutten                  |                       |                  |             |                                          |                                                         |                                                                                            |
| Harm J. T.                        | Rutten                  |                       |                  |             |                                          |                                                         |                                                                                            |
| Marit E.                          | van der Sande           |                       |                  |             |                                          |                                                         |                                                                                            |
| Boudewijn E.                      | Schaafsma               |                       |                  |             |                                          |                                                         |                                                                                            |
| R.                                | Schaapman               |                       |                  |             |                                          |                                                         |                                                                                            |
| Renske A.                         | Schasfoort              |                       |                  |             |                                          |                                                         |                                                                                            |
| M.                                | Scheer                  |                       |                  |             |                                          |                                                         |                                                                                            |
| G.                                | van der Schelling       |                       |                  |             |                                          |                                                         |                                                                                            |
| Merel M.                          | Scheurkogel             |                       |                  |             |                                          |                                                         |                                                                                            |
| Lotte                             | Schoonderwoerd          |                       |                  |             |                                          |                                                         |                                                                                            |
| N.                                | Schouten                |                       |                  |             |                                          |                                                         |                                                                                            |
| Arjan P.                          | Schouten van der Velden |                       |                  |             |                                          |                                                         |                                                                                            |
| Anne Marthe                       | Schreuder               |                       |                  |             |                                          |                                                         |                                                                                            |
| Wilhelmina H.                     | Schreurs                |                       |                  |             |                                          |                                                         |                                                                                            |
| Puck M. E.                        | Schuivens               |                       |                  |             |                                          |                                                         |                                                                                            |
| Colin                             | Sietses                 |                       |                  |             |                                          |                                                         |                                                                                            |
| Geert A.                          | Simkens                 |                       |                  |             |                                          |                                                         |                                                                                            |
| Petra C. G.                       | Simons                  |                       |                  |             |                                          |                                                         |                                                                                            |

## Supplemental Online Content: Nonauthor Collaborators

\*First name, last name, and suffix (if applicable) are required and will appear in PubMed.

| *First Name and Middle Initial(s) | *Last Name        | *Suffix (eg, Jr, III) | Academic Degrees | Institution | Location (city, state/province, country) | Role or Contribution, eg, chair, principal investigator | Group (if more than 1 Group listed in the byline) and/or Subgroup (eg, Steering Committee) |
|-----------------------------------|-------------------|-----------------------|------------------|-------------|------------------------------------------|---------------------------------------------------------|--------------------------------------------------------------------------------------------|
| Marjan J.                         | Slob              |                       |                  |             |                                          |                                                         |                                                                                            |
| Gerrit D.                         | Slooter           |                       |                  |             |                                          |                                                         |                                                                                            |
| H. C. E.                          | Sluijmer          |                       |                  |             |                                          |                                                         |                                                                                            |
| Martsje                           | van der Sluis     |                       |                  |             |                                          |                                                         |                                                                                            |
| Niels                             | Smakman           |                       |                  |             |                                          |                                                         |                                                                                            |
| Bo P.                             | Smalbroek         |                       |                  |             |                                          |                                                         |                                                                                            |
| Robert M.                         | Smeenk            |                       |                  |             |                                          |                                                         |                                                                                            |
| Anke B.                           | Smits             |                       |                  |             |                                          |                                                         |                                                                                            |
| Heleen S.                         | Snijders          |                       |                  |             |                                          |                                                         |                                                                                            |
| Dirk J. A.                        | Sonneveld         |                       |                  |             |                                          |                                                         |                                                                                            |
| B.                                | Spaansen          |                       |                  |             |                                          |                                                         |                                                                                            |
| A.                                | van der Spek      |                       |                  |             |                                          |                                                         |                                                                                            |
| Ernst J.                          | Spillenaar-Bilgen |                       |                  |             |                                          |                                                         |                                                                                            |
| Patty H.                          | Spruit            |                       |                  |             |                                          |                                                         |                                                                                            |
| T.                                | van Sprundel      |                       |                  |             |                                          |                                                         |                                                                                            |
| Tanja C.                          | Stam              |                       |                  |             |                                          |                                                         |                                                                                            |
| L.                                | van Steensel      |                       |                  |             |                                          |                                                         |                                                                                            |
| E.                                | Steller           |                       |                  |             |                                          |                                                         |                                                                                            |
| W. H.                             | Steup             |                       |                  |             |                                          |                                                         |                                                                                            |
| C.                                | Steur             |                       |                  |             |                                          |                                                         |                                                                                            |
| Jaap                              | Stoker            |                       |                  |             |                                          |                                                         |                                                                                            |
| E.                                | Stortelder        |                       |                  |             |                                          |                                                         |                                                                                            |
| J.                                | Straatman         |                       |                  |             |                                          |                                                         |                                                                                            |
| H. A.                             | Swank             |                       |                  |             |                                          |                                                         |                                                                                            |
| Aaldert K.                        | Talsma            |                       |                  |             |                                          |                                                         |                                                                                            |
| Sofieke                           | Temminck          |                       |                  |             |                                          |                                                         |                                                                                            |
| Willem F.                         | van Tets          |                       |                  |             |                                          |                                                         |                                                                                            |
| G. Y. M.                          | The               |                       |                  |             |                                          |                                                         |                                                                                            |
| I. M.                             | Thorensen         |                       |                  |             |                                          |                                                         |                                                                                            |
| Jeroen A. W.                      | Tielbeek          |                       |                  |             |                                          |                                                         |                                                                                            |
| Aukje A. J. M.                    | van Tilborg       |                       |                  |             |                                          |                                                         |                                                                                            |

## Supplemental Online Content: Nonauthor Collaborators

\*First name, last name, and suffix (if applicable) are required and will appear in PubMed.

| *First Name and Middle Initial(s) | *Last Name           | *Suffix (eg, Jr, III) | Academic Degrees | Institution | Location (city, state/province, country) | Role or Contribution, eg, chair, principal investigator | Group (if more than 1 Group listed in the byline) and/or Subgroup (eg, Steering Committee) |
|-----------------------------------|----------------------|-----------------------|------------------|-------------|------------------------------------------|---------------------------------------------------------|--------------------------------------------------------------------------------------------|
| Fiek                              | van Tilborg          |                       |                  |             |                                          |                                                         |                                                                                            |
| B.                                | Tip-Pluijm           |                       |                  |             |                                          |                                                         |                                                                                            |
| Boudewijn R.                      | Toorenvliet          |                       |                  |             |                                          |                                                         |                                                                                            |
| Dorothee                          | van Trier            |                       |                  |             |                                          |                                                         |                                                                                            |
| L.                                | Tseng                |                       |                  |             |                                          |                                                         |                                                                                            |
| Maxime J. M.                      | van der Valk         |                       |                  |             |                                          |                                                         |                                                                                            |
| Inge J. S.                        | Vanhooymissen        |                       |                  |             |                                          |                                                         |                                                                                            |
| G. Boudewijn C.                   | Vasbinder            |                       |                  |             |                                          |                                                         |                                                                                            |
| Cornelis J.                       | Veeken               |                       |                  |             |                                          |                                                         |                                                                                            |
| Cornelis J. H.                    | van de Velde         |                       |                  |             |                                          |                                                         |                                                                                            |
| S.                                | Veltkamp             |                       |                  |             |                                          |                                                         |                                                                                            |
| Laura A.                          | Velema               |                       |                  |             |                                          |                                                         |                                                                                            |
| Anthony W. H.                     | van de Ven           |                       |                  |             |                                          |                                                         |                                                                                            |
| Emiel G. G.                       | Verdaasdonk          |                       |                  |             |                                          |                                                         |                                                                                            |
| Wouter M.                         | Verduin              |                       |                  |             |                                          |                                                         |                                                                                            |
| T.                                | Verhaak              |                       |                  |             |                                          |                                                         |                                                                                            |
| Tim                               | Verhagen             |                       |                  |             |                                          |                                                         |                                                                                            |
| Paul M.                           | Verheijen            |                       |                  |             |                                          |                                                         |                                                                                            |
| Maarten                           | Vermaas              |                       |                  |             |                                          |                                                         |                                                                                            |
| An-Sofie E.                       | Verrijssen           |                       |                  |             |                                          |                                                         |                                                                                            |
| Anna V. D.                        | Verschuur            |                       |                  |             |                                          |                                                         |                                                                                            |
| L.                                | Versluis-Ossenwaarde |                       |                  |             |                                          |                                                         |                                                                                            |
| Harmke                            | Verwoerd-van Schaik  |                       |                  |             |                                          |                                                         |                                                                                            |
| S.                                | Vijfhuize            |                       |                  |             |                                          |                                                         |                                                                                            |
| Wouter J.                         | Vles                 |                       |                  |             |                                          |                                                         |                                                                                            |
| Roy F. A.                         | Vliegen              |                       |                  |             |                                          |                                                         |                                                                                            |
| Stijn                             | Voeten               |                       |                  |             |                                          |                                                         |                                                                                            |
| Sophie                            | Voets                |                       |                  |             |                                          |                                                         |                                                                                            |
| F. Jeroen                         | Vogelaar             |                       |                  |             |                                          |                                                         |                                                                                            |
| Clementine L. A.                  | Vogelij              |                       |                  |             |                                          |                                                         |                                                                                            |

## Supplemental Online Content: Nonauthor Collaborators

\*First name, last name, and suffix (if applicable) are required and will appear in PubMed.

| *First Name and Middle Initial(s) | *Last Name                  | *Suffix (eg, Jr, III) | Academic Degrees | Institution | Location (city, state/province, country) | Role or Contribution, eg, chair, principal investigator | Group (if more than 1 Group listed in the byline and/or Subgroup (eg, Steering Committee) |
|-----------------------------------|-----------------------------|-----------------------|------------------|-------------|------------------------------------------|---------------------------------------------------------|-------------------------------------------------------------------------------------------|
| Hanneke A.                        | Vos-Westerman,              |                       |                  |             |                                          |                                                         |                                                                                           |
| R. J. L.                          | de Vos tot Nederveen Cappel |                       |                  |             |                                          |                                                         |                                                                                           |
| W. W.                             | Vrijland                    |                       |                  |             |                                          |                                                         |                                                                                           |
| Joy C.                            | Vroemen                     |                       |                  |             |                                          |                                                         |                                                                                           |
| Bas S. T.                         | van Vugt                    |                       |                  |             |                                          |                                                         |                                                                                           |
| Johannes A.                       | Wegdam                      |                       |                  |             |                                          |                                                         |                                                                                           |
| M. A. J.                          | van de Weijer               |                       |                  |             |                                          |                                                         |                                                                                           |
| Bob J.                            | van Wely                    |                       |                  |             |                                          |                                                         |                                                                                           |
| Emma                              | Westerduin                  |                       |                  |             |                                          |                                                         |                                                                                           |
| Marinke                           | Westerterp                  |                       |                  |             |                                          |                                                         |                                                                                           |
| Paul P.                           | van Westerveld              |                       |                  |             |                                          |                                                         |                                                                                           |
| M.                                | Wetzel                      |                       |                  |             |                                          |                                                         |                                                                                           |
| K.                                | Wevers                      |                       |                  |             |                                          |                                                         |                                                                                           |
| N.                                | van der Wielen              |                       |                  |             |                                          |                                                         |                                                                                           |
| B.                                | Wiering                     |                       |                  |             |                                          |                                                         |                                                                                           |
| Allard G.                         | Wijma                       |                       |                  |             |                                          |                                                         |                                                                                           |
| Bart W. K.                        | de Wit                      |                       |                  |             |                                          |                                                         |                                                                                           |
| Fennie                            | Wit                         |                       |                  |             |                                          |                                                         |                                                                                           |
| A. C.                             | Witjes                      |                       |                  |             |                                          |                                                         |                                                                                           |
| Karlijn                           | Woensdregt                  |                       |                  |             |                                          |                                                         |                                                                                           |
| Victor                            | van Woerden                 |                       |                  |             |                                          |                                                         |                                                                                           |
| J.                                | van der Wolde               |                       |                  |             |                                          |                                                         |                                                                                           |
| Floor S. W.                       | van der Wolf                |                       |                  |             |                                          |                                                         |                                                                                           |
| Sander                            | van der Wolk                |                       |                  |             |                                          |                                                         |                                                                                           |
| Michel W. J. M.                   | Wouters                     |                       |                  |             |                                          |                                                         |                                                                                           |
| Johannes M.                       | Wybenga                     |                       |                  |             |                                          |                                                         |                                                                                           |
| Simon T. K.                       | Yauw                        |                       |                  |             |                                          |                                                         |                                                                                           |
| Edwin S.                          | van der Zaag                |                       |                  |             |                                          |                                                         |                                                                                           |
| Bobby                             | Zamaray                     |                       |                  |             |                                          |                                                         |                                                                                           |
| Herman J. A.                      | Zandvoort                   |                       |                  |             |                                          |                                                         |                                                                                           |

Supplemental Online Content: Nonauthor Collaborators

\*First name, last name, and suffix (if applicable) are required and will appear in PubMed.

| <b>*First Name and Middle Initial(s)</b> | <b>*Last Name</b> | <b>*Suffix (eg, Jr, III)</b> | Academic Degrees | Institution | Location (city, state/province, country) | Role or Contribution, eg, chair, principal investigator | Group (if more than 1 Group listed in the byline) and/or Subgroup (eg, Steering Committee) |
|------------------------------------------|-------------------|------------------------------|------------------|-------------|------------------------------------------|---------------------------------------------------------|--------------------------------------------------------------------------------------------|
| Dennis                                   | van der Zee       |                              |                  |             |                                          |                                                         |                                                                                            |
| E. C.                                    | Zeestraten        |                              |                  |             |                                          |                                                         |                                                                                            |
| Annette                                  | Zeilstra          |                              |                  |             |                                          |                                                         |                                                                                            |
| Kang J.                                  | Zheng             |                              |                  |             |                                          |                                                         |                                                                                            |
| Marcel                                   | Zorgdrager        |                              |                  |             |                                          |                                                         |                                                                                            |
| T.                                       | Zwieten           |                              |                  |             |                                          |                                                         |                                                                                            |
