# Supplementary material
Source: PubMed Central journal article supplement (PMC10739079)
Supplement: jamaoncol-e235444-s003.pdf [file jamaoncol-e235444-s003.pdf]

## Data Sharing Statement

Hazen. Abandonment of Routine Radiotherapy for Nonlocally Advanced Rectal Cancer and Oncological Outcomes. *JAMA Oncol.* Published December 21, 2023.

doi:10.1001/jamaoncol.2023.5444

### Data

**Data available:** Yes

**Data types:** Deidentified participant data

**How to access data:** The data that support the findings of this study are available from the corresponding author, MK, upon reasonable request.

**When available:** With publication

### Supporting Documents

**Document types:** None

### Additional Information

**Who can access the data:** The data that support the findings of this study are available from the corresponding author, MK, upon reasonable request.

**Types of analyses:** The data that support the findings of this study are available from the corresponding author, MK, upon reasonable request.

**Mechanisms of data availability:** The data that support the findings of this study are available from the corresponding author, MK, upon reasonable request.
